# Supplementary material
Source: PubMed Central journal article supplement (PMC10311467)
Supplement: NIHMS1818881-supplement-1.pdf [file NIHMS1818881-supplement-1.pdf]

## List of Hyperlinks for Crosschecking

### Proteinase-activated receptor-2 (PAR2):

<https://www.guidetopharmacology.org/GRAC/ObjectDisplayForward?objectId=348>

### Missing from the guide to pharmacology:

#### **2-aminothiazol-4-yl-LIGRL-NH<sub>2</sub>; 2-aminothiazole-LIGR-NH<sub>2</sub>; 2at-LIGRL-NH<sub>2</sub>; 2AT:**

*Original publications:* (Boitano et al., 2011; Flynn et al., 2011)

#### **C391:**

(2S)-6-amino-N-((S)-1-(((S)-1-amino-3-(4-hydroxyphenyl)-1-oxopropan-2-yl)amino)-4-methyl-1-oxopentan-2-yl)-2-

((3S)-1-(furan-2-carbonyl)-3-(3-methylbutanamido)-4,7-dioxooctahydro-8H-pyrazino[1,2-a]pyrimidin-8-yl)hexanamide

*Original publication:* (Boitano et al., 2015)

#### **C781** (described in the supplemental data of this manuscript):

N-((3S,6S)-1-furan-2-carbonyl)-6-isobutyl-4,7-dioxo-8-(piperidin-4-ylmethyl)octahydro-2H-pyrazino[1,2-a]pyrimidin-3-yl)-3-methylbutaneamide

Boitano, S., Flynn, A. N., Schulz, S. M., Hoffman, J., Price, T. J., & Vagner, J. (2011). Potent Agonists of the Protease Activated Receptor 2 (PAR<sub>2</sub>). *Journal of medicinal chemistry*, 54(5), 1308-1313. doi:[10.1021/jm1013049](https://doi.org/10.1021/jm1013049)

Boitano, S., Hoffman, J., Flynn, A. N., Asiedu, M. N., Tillu, D. V., Zhang, Z., ... Price, T. J. (2015). The novel PAR<sub>2</sub> ligand C391 blocks multiple PAR<sub>2</sub> signaling pathways *in vitro* and *in vivo*. *British journal of pharmacology*, 172(18), 4535-4545. doi:[10.1111/bph.13238](https://doi.org/10.1111/bph.13238)

Flynn, A. N., Tillu, D. V., Asiedu, M. N., Hoffman, J., Vagner, J., Price, T. J., & Boitano, S. (2011). The protease-activated receptor-2-specific agonists 2-aminothiazol-4-yl-LIGRL-NH<sub>2</sub> and 6-aminonicotinyl-LIGRL-NH<sub>2</sub> stimulate multiple signaling pathways to induce physiological responses *in vitro* and *in vivo*. *The Journal of biological chemistry*, 286(21), 19076-19088. doi:[10.1074/jbc.M110.185264](https://doi.org/10.1074/jbc.M110.185264)
