# Supplementary material
Source: PubMed Central journal article supplement (PMC10311467)
Supplement: NIHMS1818881-supplement-supinfo.pdf [file NIHMS1818881-supplement-supinfo.pdf]

1 **SUPPLEMENTARY DATA**

2 **Synthesis of C781: N-((3S,6S)-1-furan-2-carbonyl)-6-isobutyl-4,7-dioxo-8-(piperidin-4-**  
3 **ylmethyl)octahydro-2H-pyrazino[1,2-a]pyrimidin-3-yl)-3-methylbutaneamide.**

4 *Chemical Materials:*

5 *N*- $\alpha$ -Fmoc-protected amino acids, TCFH, DIC, and HOBt were purchased from SynPep (Dublin,  
6 CA) or from Novabiochem (San Diego, CA). Bromoacetal, 2-Chloro-chlorotriyl, and Wang resins  
7 were acquired from Rapp Polymere (Tubingen, Germany). Alloc group was used as a side chain  
8 protecting groups for the *N* $\alpha$ -Fmoc-Dap(*N* $^{\beta}$ -Alloc). Reagent grade solvents, reagents, and  
9 acetonitrile for HPLC were acquired from VWR (West Chester, PA) or Sigma-Aldrich (St. Louis,  
10 MO) and were used without further purification unless otherwise noted. Chemicals and reagents  
11 were obtained from Sigma-Aldrich or TCI (Portland, OR). The solid-phase synthesis was  
12 performed in fritted syringes using a Domino manual synthesizer obtained from Torviq (Niles,  
13 MI).

14 *General Synthesis:*

15 All solution phase reactions were conducted under Argon atmosphere using oven-dried glassware.  
16 <sup>1</sup>H NMR spectra were recorded on a Bruker-DRX-300 MHz instrument with chemical shifts  
17 reported relative to tetramethylsilane (TMS; 0.0 ppm) and residual dimethyl sulfoxide (DMSO;  
18 2.50 ppm). Proton-decoupled <sup>13</sup>C NMR spectra were referenced to CDCl<sub>3</sub> (77.0 ppm) as well as  
19 DMSO (39.51 ppm). Low resolution mass spectra were obtained on a Bruker AmaZon SL Ion  
20 Trap Mass Spectrometer with ESI source (Madison, WI). High resolution mass spectra (HRMS)  
21 were recorded on a Bruker SolariX Fourier-transform Ion Cyclotron Resonance Mass  
22 Spectrometer, 9.4T magnet, with ESI source (Madison, WI).

23 *Quality control and purification:*

24 The purity of products was checked by analytical reverse phase HPLC using a Waters Alliance  
25 2695 Separation Model (Milford, MA) with a Waters 2487 dual wavelength detector (220 and 280  
26 nm) on a reverse phase column (Waters Symmetry C18, 4.6 × 75 mm, 3.5  $\mu$ m). Crude compounds  
27 were eluted with a linear gradient of aqueous CH<sub>3</sub>CN/0.1% CF<sub>3</sub>CO<sub>2</sub>H at a flow rate of 1.0 mL/min.  
28 Purification of compounds was achieved on a Waters 600 HPLC using a reverse phase column  
29 (Vydac C18, 15–20  $\mu$ m, 22 × 250 mm). Compounds were eluted with a linear gradient of  
30 CH<sub>3</sub>CN/0.1% CF<sub>3</sub>CO<sub>2</sub>H at a flow rate of 5.0 mL/min. Separation was monitored at 230 and 280  
31 nm. Flash chromatography was performed on a borosilicate glass column (2.6 × 250 mm, Sigma-  
32 Aldrich, St. Louis, MO) filled with 60A silicagel (Sigma-Aldrich,). The compounds were eluted  
33 with a step gradient flow of hexane/EtOAc/MeOH mixtures.  
34

35 Preparation of the cyclized azabicycloalkane analog C781 (Scheme S1).

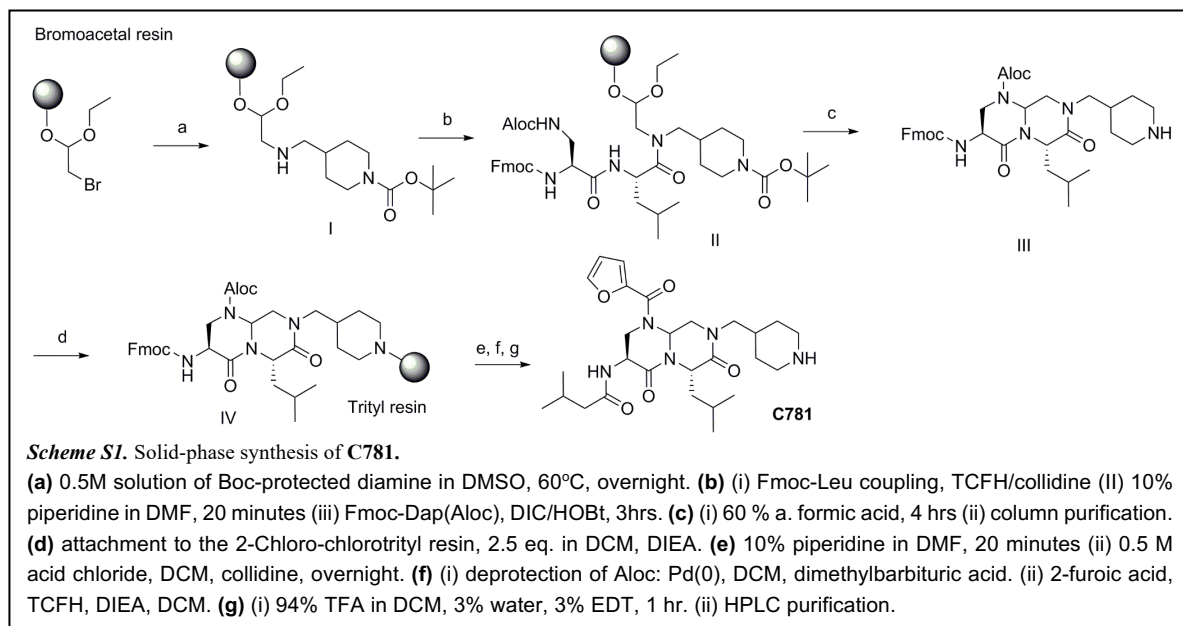

36 Intermediate I: The bromoacetal resin (0.2g, 0.25 mmol) was swelled for 2 hours by the addition  
 37 of DCM. The swollen resin was carried out through the solid-phase procedure. The resin was  
 38 washed successively with dimethylformamide (DMF; 3 × 2 min), dichloromethane (DCM; 3 ×  
 39 2 min), DMSO (5 × 2 min). Amine displacement of bromine was accomplished with 0.5M  
 40 solution of 1-*N*-Boc-4-(aminomethyl)piperidine (0.214 g, 1mmol, 4 equiv.) in DMSO at 60°C  
 41 overnight. The reaction mixture was removed by filtration and the resin was washed successively  
 42 with DMSO (5 × 2 min) and DCM (3 × 2 min). Before coupling of Fmoc-Leu, the resin was  
 43 neutralized with 10% diisopropylethylamine (DIEA) in DCM (2 × 3 min), followed by washing  
 44 successively with DCM (3 × 2 min) and DMF (5 × 2 min).

45 Intermediate II:

46 The intermediate resin I from above (0.2g, 0.25 mmol) was coupled with Fmoc-Leu. The coupling  
 47 was performed by adding Fmoc-Leu (0.353g, 1 mmol, 4 equiv) and coupling reagents  
 48 [tetramethylchloroformamidium hexafluorophosphate (TCFH) 0.28g, 1mmol, 4 equiv and;  
 49 diisopropylethylamine (DIEA) 0.35 mL, 2 mmol, 8 equiv] in DMF (2 mL) to the resin and stirring  
 50 the mixture overnight. A second TCFH coupling was performed for 3 hour. The reaction mixture  
 51 was removed by filtration and the resin was washed with DMF (5 × 2 min) and DCM (3 × 2  
 52 min). The *N*<sup>α</sup>-Fmoc protecting group was removed with 1:10 piperidine in DMF (1 × 2 min and  
 53 1 × 20 min). The resin was washed successively with DMF (5 × 2 min), DCM (3 × 2 min), a  
 54 solution of 0.05 mM solution of Bromophenol Blue in 0.2 M *N*-hydroxybenzotriazole HOBt in  
 55 DMF, then DMF (3 × 2 min). The *N*<sup>α</sup>-Fmoc-Dap(Aloc) was coupled using pre-activated 0.3 M  
 56 HOBt esters in DMF-DCM mixture (3 equiv of *N*<sup>α</sup>-Fmoc-Dap(Aloc), 3 equiv of HOBt, and 3  
 57 equiv of DIC). The resin slurry was stirred for 2 h or until the bromophenol test became negative  
 58 (yellow). The resin was washed with DMF (3 × 2 min). A second coupling was performed by the  
 59 HCTU/2,4,6-lutidine procedure (0.3 M solution of 3 equiv of *N*<sup>α</sup>-Fmoc-Dap(Aloc), 3 equiv of  
 60 HCTU, and 6 equiv of 2,4,6-lutidine in DMF. The reaction mixture was removed by filtration and

61 the resin was washed with DMF (5 × 2 min), DCM (3 × 2 min), and then MeOH (3 x 2 min).  
62 The reactor was placed in vacuum oven to remove solvents.

#### 63 Intermediate III:

64 The dry intermediate resin II from above (0.2g, 0.25 mmol) was treated with 60% formic acid (2  
65 mL) for 4 hrs. The resin was filtrated and washed with water (2 x 2 min). Acid filtrate and washes  
66 were collected and lyophilized. The crude intermediate III was purified using column  
67 chromatography to yield pure III (74 mg, 53%, (M+H)<sup>+</sup> 559.3, HPLC >95%).

#### 68 Intermediate IV:

69 The dry intermediate III from above (74 mg, 132 μmol) was added to dry 2-Chloro-chlorotriptyl  
70 resin (250 mg, 430 μmol, 2.5 equiv.). Dry DCM (2.0 mL) and DIEA (171 μL, 1.0 mmol) were  
71 injected into the resin and the mixture was agitated at room temperature for overnight. The reaction  
72 was quenched by adding MeOH (0.2 mL, 30 min). The reaction mixture was removed by filtration  
73 and the resin was washed with DMF (3 × 2 min), DCM (5 × 2 min), and then DMF (2 x 2 min).

#### 74 Final product C781:

75 The intermediate resin IV from above was deprotected by piperidine. The *N*<sup>α</sup>-Fmoc protecting  
76 group was removed with 1:10 piperidine in DMF (1 × 2 min and 1 × 20 min). The resin was  
77 washed with DMF (5 × 2 min) and then DCM (5 × 2 min). The isovaleric acid was coupled using  
78 0.3 M acid chloride in DCM (isovaleryl chloride, 121 mg, 1.0 mmol, 7.6 equiv; pyridine, 80 mL,  
79 1.0 mmol, 7.6 equiv). The resin slurry was stirred for 3 h, the reaction mixture removed by  
80 filtration, the resin was washed with DCM (5 × 2 min) and the isovaleric acid was coupled again  
81 using 5 equiv. The reaction mixture was removed by filtration and the resin was washed  
82 successively with DMF (5 × 2 min), DCM (3 × 2 min). The *N*<sup>α</sup>-Aloc protecting group was  
83 removed with Palladium catalyzed cleavage (Tetrakis(triphenylphosphine)palladium(0)  
84 (Pd(PPh<sub>3</sub>)<sub>4</sub>), 11.5 mg, 0.01 mmol; 1,3-dimethylbarbituric acid, 78 mg, 0.5 mmol) in 0.5 mL DCM  
85 then repeated (2 × 30 min). The resin was washed successively with DCM (3 × 2 min), DMF (5  
86 × 2 min), with a solution of 0.5 M Sodium diethyldithiocarbamate trihydrate (113 mg in 1 mL) in  
87 DMF (2 × 20 min), then washed with DMF (5 × 2 min). The resin was neutralized by 0.5 M  
88 diisopropylethylamine DIEA in DMF (5 × 2 min), then washed with DMF (5 × 2 min) and DCM  
89 (5 x 2 min). The final coupling was performed by adding 2-furoic acid (112 mg, 1 mmol, 7.6 equiv)  
90 and coupling reagents [TCFH (0.28g, 1mmol, 7.6 equiv) and DIEA (0.35 mL, 2 mmol, 15.2 equiv)]  
91 in DCM (2 mL) to the resin and stirring the mixture overnight. The coupling was repeated for 3  
92 hours using 5 equiv of 2-furoic acid. The reaction mixture was removed by filtration and the resin  
93 was washed successively with DMF (5 × 2 min), DCM (7 × 2 min), then cleaved by strong acid.  
94 A cleavage cocktail (2.0 mL) consisting of CF<sub>3</sub>CO<sub>2</sub>H (94%), H<sub>2</sub>O (3%), and 1,2-ethylenedithiol  
95 EDT (3%) was injected into the resin and the mixture was agitated at room temperature for 4 h.  
96 The solution was filtered, the resin was washed with CF<sub>3</sub>CO<sub>2</sub>H (2 × 3 min), the liquid phases were  
97 collected and concentrated under a stream of nitrogen, and the product was precipitated using cold  
98 diethyl ether/hexane [(Et<sub>2</sub>O)/hexane]. The crude product was washed three times with cold  
99 Et<sub>2</sub>O/hexane, lyophilized, purified by HPLC, and characterized as described above. The desired  
100 product was 25 mg of C781 as a white lyophilizate (yield 19%).

101

102

103 **Analytical data:**

104 (M+H)<sup>+</sup> 515.30, HPLC >95%).

105 <sup>1</sup>H NMR: 0.86 (d, 6H), 0.90 (d, 6H), 1.30 (m, 4H), 1.60 (m, 1H), 1.74 (t, 2H), 1.97 (m, 1H), 2.0  
106 (d, 2H), 2.02 (m, 1H), 2.81(m, 4H), 3.3 (t, 2H), 3.50 (t, 2H), 3.70(m, 2H), 4.5 (t, 1H), 5.0 (t, 1H),  
107 6.10 (t, 1H), 6.7(t, 1H), 7.30 (d, 1H), 7.92 (d, 1H), 8.25(d, 1H).

108 <sup>13</sup>C NMR: 26.8 (CH<sub>3</sub>), 27.5 (CH<sub>3</sub>), 28.3 (CH), 29.5 (CH), 30.7 (CH<sub>2</sub>), 32.0 ((CH), 32.5 (CH),  
109 48.2 ((CH<sub>2</sub>), 49.5 (CH<sub>2</sub>), 52.3 (CH<sub>2</sub>), 52.8 (CH<sub>2</sub>), 54.1 (CH<sub>2</sub>), 58.5 (CH), 114.1 (CH), 117.3  
110 (ArCH), 150.5 (ArCH), 151.5 (ArCH), 164.1 (CO), 170.07 (CO), 172.3 (CO), 177.6 (CO)

111

112 **Non-standard abbreviations for medicinal chemistry:**

|     |                            |                                                            |
|-----|----------------------------|------------------------------------------------------------|
| 113 | <b>Alloc</b>               | <b>allyloxycarbonyl</b>                                    |
| 114 | <b>Boc</b>                 | <b>t-butyloxycarbonyl</b>                                  |
| 115 | <b>Dap</b>                 | <b>diaminopropionic acid</b>                               |
| 116 | <b>DCM</b>                 | <b>dichloromethane</b>                                     |
| 117 | <b>DIC</b>                 | <b>N,N'-diisopropylcarbodiimide</b>                        |
| 118 | <b>DIEA</b>                | <b>diisopropylethylamine</b>                               |
| 119 | <b>DMF</b>                 | <b>N,N'-dimethylformamide</b>                              |
| 120 | <b>EDT</b>                 | <b>1,2-ethylenedithiol</b>                                 |
| 121 | <b>ESI-MS</b>              | <b>electrospray ionization - mass spectrometry</b>         |
| 122 | <b>EtOAc</b>               | <b>ethyl acetate</b>                                       |
| 123 | <b>Et<sub>2</sub>O</b>     | <b>diethylether</b>                                        |
| 124 | <b>Fmoc</b>                | <b>(9H-fluoren-9-ylmethoxy)carbonyl</b>                    |
| 125 | <b>HBTU</b>                | <b>2-(1H-benzotriazol-1-yl)-1,1,3,3-tetramethyluronium</b> |
| 126 |                            | <b>hexafluoro-phosphate</b>                                |
| 127 | <b>HOBt</b>                | <b>N-hydroxybenzotriazole</b>                              |
| 128 | <b>HPLC</b>                | <b>high performance liquid chromatography</b>              |
| 129 | <b>OBt</b>                 | <b>O-benzotriazolyl</b>                                    |
| 130 | <b>MeOH</b>                | <b>methanol</b>                                            |
| 131 | <b>NMR</b>                 | <b>Nuclear magnetic resonance</b>                          |
| 132 | <b>Pd(TPP)<sub>4</sub></b> | <b>Palladium (0) tetrakis(triphenylphosphine)</b>          |
| 133 | <b>SPE</b>                 | <b>solid-phase extraction</b>                              |
| 134 | <b>SPPS</b>                | <b>solid-phase peptide synthesis</b>                       |
| 135 | <b>TCFH</b>                | <b>tetramethylchloroformamidium hexafluorophosphate</b>    |
| 136 | <b>THF</b>                 | <b>tetrahydrofuran</b>                                     |
| 137 | <b>TFA</b>                 | <b>trifluoroacetic acid</b>                                |
| 138 | <b>TMS</b>                 | <b>tetramethylsilane</b>                                   |
| 139 |                            |                                                            |

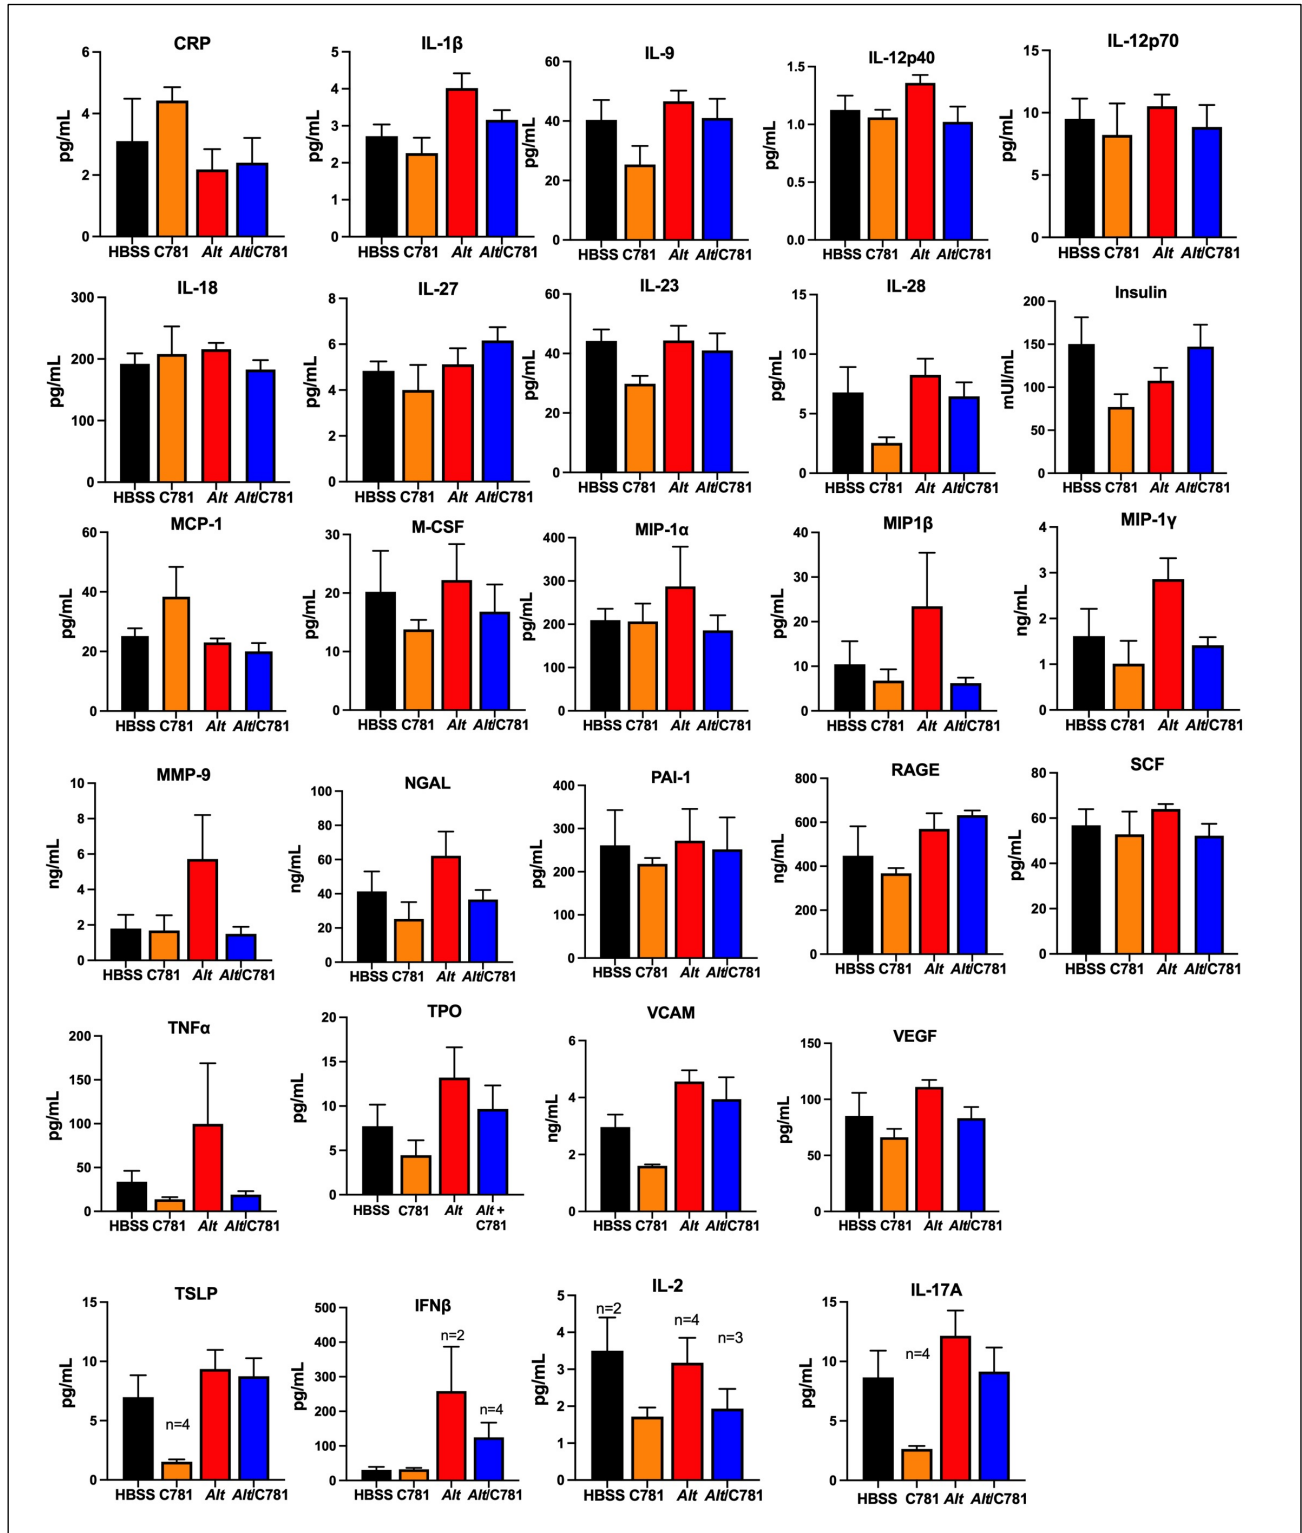

140 **Supplementary Figure 1: Cytokine and signalling molecule measurements from**  
 141 **bronchoalveolar lavage fluid (BALF).** The top 24 panels represent cytokines and signalling  
 142 molecule concentrations from BALF that did not show significant changes in response to *A.*  
 143 *alternata*. Trends are shown in the bottom four panels that did not have sufficient  
 144 measurements to perform statistical evaluations and thus represent preliminary findings.

| <b>Cytokine/Signaling Molecule</b>               | <b>Abbr.</b>                    | <b>LDD</b> | <b>LLOQ</b> | <b>Units</b> |
|--------------------------------------------------|---------------------------------|------------|-------------|--------------|
| Chemokine (C-C motif) ligand 6                   | <b>CCL6</b>                     | 0.0096     | 0.021       | pg/mL        |
| C-Reactive Protein                               | <b>CRP</b>                      | 1.1        | 6.5         | ng/mL        |
| Eotaxin                                          | <b>Eotaxin</b>                  | 1.8        | 5.0         | pg/mL        |
| Granulocyte Chemotactic Protein 2                | <b>GCP-2</b>                    | 0.091      | 0.096       | ng/mL        |
| Granulocyte-Macrophage Colony-Stimulating Factor | <b>GM-CSF</b>                   | 0.20       | 0.46        | pg/mL        |
| Interferon beta                                  | <b>IFN<math>\beta</math></b>    | 4.8        | 11.0        | pg/mL        |
| Interferon gamma                                 | <b>IFN<math>\gamma</math></b>   | 0.057      | 0.090       | pg/mL        |
| Interleukin 10                                   | <b>IL-10</b>                    | 0.63       | 1.0         | pg/mL        |
| Interleukin 12p40                                | <b>IL-12p40</b>                 | 0.085      | 0.23        | ng/mL        |
| Interleukin 12 p70                               | <b>IL-12p70</b>                 | 2.2        | 2.5         | pg/mL        |
| Interleukin 17A                                  | <b>IL-17A</b>                   | 1.9        | 3.4         | pg/mL        |
| Interleukin 18                                   | <b>IL-18</b>                    | 17         | 36          | pg/mL        |
| Interleukin 1 alpha                              | <b>IL-1<math>\alpha</math></b>  | 6.3        | 11          | pg/mL        |
| Interleukin 1 beta                               | <b>IL-1<math>\beta</math></b>   | 0.35       | 0.53        | pg/mL        |
| Interleukin 2                                    | <b>IL-2</b>                     | 0.93       | 1.6         | pg/mL        |
| Interleukin 23                                   | <b>IL-23</b>                    | 6.7        | 11          | pg/mL        |
| Interleukin 27                                   | <b>IL-27</b>                    | 2.1        | 3.5         | pg/mL        |
| Interleukin 28                                   | <b>IL-28</b>                    | 1.2        | 2.1         | pg/mL        |
| Interleukin 4                                    | <b>IL-4</b>                     | 0.14       | 0.30        | pg/mL        |
| Interleukin 5                                    | <b>IL-5</b>                     | 4.2        | 14          | pg/mL        |
| Interleukin 6                                    | <b>IL-6</b>                     | 0.71       | 2.3         | pg/mL        |
| Interleukin 9                                    | <b>IL-9</b>                     | 10         | 14          | pg/mL        |
| Insulin                                          | <b>Insulin</b>                  | 4.3        | 7.7         | mUI/mL       |
| Interferon Gamma Inducible Protein               | <b>IP-10</b>                    | 0.58       | 1.7         | pg/mL        |
| Growth-Regulated Protein alpha                   | <b>KC/GRO</b>                   | 0.66       | 1.1         | pg/mL        |
| Monocyte Chemotactic Protein 1                   | <b>MCP-1</b>                    | 5.4        | 6.9         | pg/mL        |
| Macrophage Colony-Stimulating Factor             | <b>M-CSF</b>                    | 0.0011     | 0.0021      | ng/mL        |
| Macrophage Derived Chemokine                     | <b>MDC</b>                      | 2.1        | 10          | pg/mL        |
| Macrophage Inflammatory Protein 1 alpha          | <b>MIP-1<math>\alpha</math></b> | 72         | 86          | pg/mL        |
| Macrophage Inflammatory Protein 1 beta           | <b>MIP-1<math>\beta</math></b>  | 0.36       | 0.51        | pg/mL        |
| Macrophage Inflammatory Protein 1 gamma          | <b>MIP-1<math>\gamma</math></b> | 0.0020     | 0.0081      | ng/mL        |
| Matrix Metalloproteinase 9                       | <b>MMP-9</b>                    | 0.12       | 0.25        | ng/mL        |
| Neutrophil Gelatinase-associated Lipocalin       | <b>NGAL</b>                     | 0.041      | 0.11        | ng/mL        |
| Plasminogen Activator Inhibitor-1                | <b>PAI-1</b>                    | 0.0050     | 0.0066      | ng/mL        |
| Receptor for Advanced Glycation End product      | <b>RAGE</b>                     | 11         | 11          | ng/mL        |
| Stem Cell Factor                                 | <b>SCF</b>                      | 7.3        | 13          | pg/mL        |
| Tissue Inhibitor of Metalloproteinases 1         | <b>TIMP-1</b>                   | 0.069      | 0.073       | ng/mL        |
| Tumor Necrosis Factor alpha                      | <b>TNF<math>\alpha</math></b>   | 2.2        | 3.7         | pg/mL        |
| Thrombopoietin                                   | <b>TPO</b>                      | 0.0057     | 0.0071      | ng/mL        |
| Thymic Stromal Lymphopoietin                     | <b>TSLP</b>                     | 0.65       | 1.3         | pg/mL        |
| Vascular Cellular Adhesion Protein 1             | <b>VCAM-1</b>                   | 0.037      | 0.052       | ng/mL        |
| Vascular Endothelial Growth Factor               | <b>VEGF-A</b>                   | 0.40       | 0.86        | pg/mL        |

145 **Table 1: Sensitivity of cytokines and signalling molecules in the Rodent MAP array**  
146 **(AmpersandBio, Lake Clear, NY).** Abbr.: abbreviations used in text; LDD: least detectable  
147 dose; LLOQ: lower limit of quantification; Units: units of measurement.  
148
